# Supplementary material for: TREM-1 governs NLRP3 inflammasome activation of macrophages by firing up glycolysis in acute lung injury
Source: PubMed Central journal article supplement (PMC9760435; doi:10.7150/ijbs.77304), 2023-01-01
Supplement: ijbsv19p0242s1.pdf [file ijbsv19p0242s1.pdf]

1 **Supplementary material**

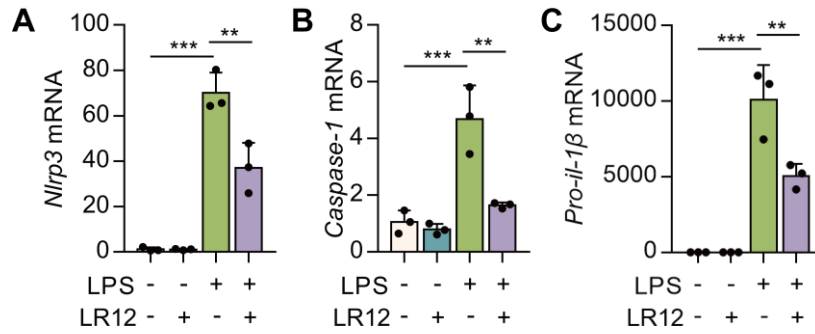

2  
3 **Supplementary Figure 1.** LR12 pretreatment attenuates the expressions of *Nlrp3*, *Pro-caspase-1*, and  
4 *Pro-il-1β* mRNA in LPS-induced macrophages. Macrophages were treated with LR12 (25 μg/mL) 30 min  
5 before LPS (100 ng/mL) stimulation. (A-C) Six hours later, the mRNA level of *Nlrp3*, *Pro-caspase-1*, and  
6 *Pro-il-1β* was detected by real-time PCR. Data are expressed as the mean ± SD. One-way ANOVA adjusted  
7 by Tukey's multiple comparison test was used. \*\*  $P < 0.01$  and \*\*\*  $P < 0.001$ .

8

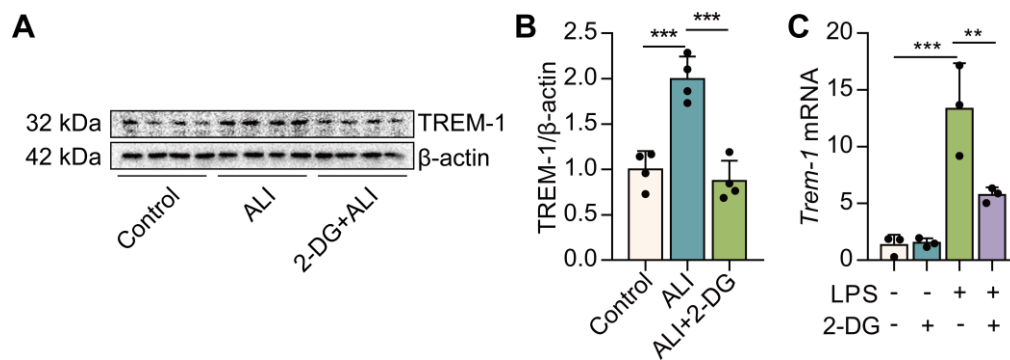

**Supplementary Figure 2.** 2-DG pretreatment attenuates the expressions of TREM-1 expression in the lung of LPS-treated mice or LPS-induced macrophages. C57BL/6J mice received LPS (5 mg/kg, *it.*) with or without 2-DG pretreatment (1 g/kg) for 1 h. **(A-B)** The expression of TREM-1 protein ( $n=4$ ) in the lung 12 h after the LPS injection was detected by western blot. **(C)** Macrophages were treated by LPS (100 ng/ml) with or without 2-DG pretreatment (5 mM). The expression of *Trem-1* mRNA in macrophages 6 h after the LPS administration was detected by real-time PCR. Data are expressed as the mean  $\pm$  SD. One-way ANOVA adjusted by Tukey's multiple comparison test was used. \*\*  $P < 0.01$  and \*\*\*  $P < 0.001$ .

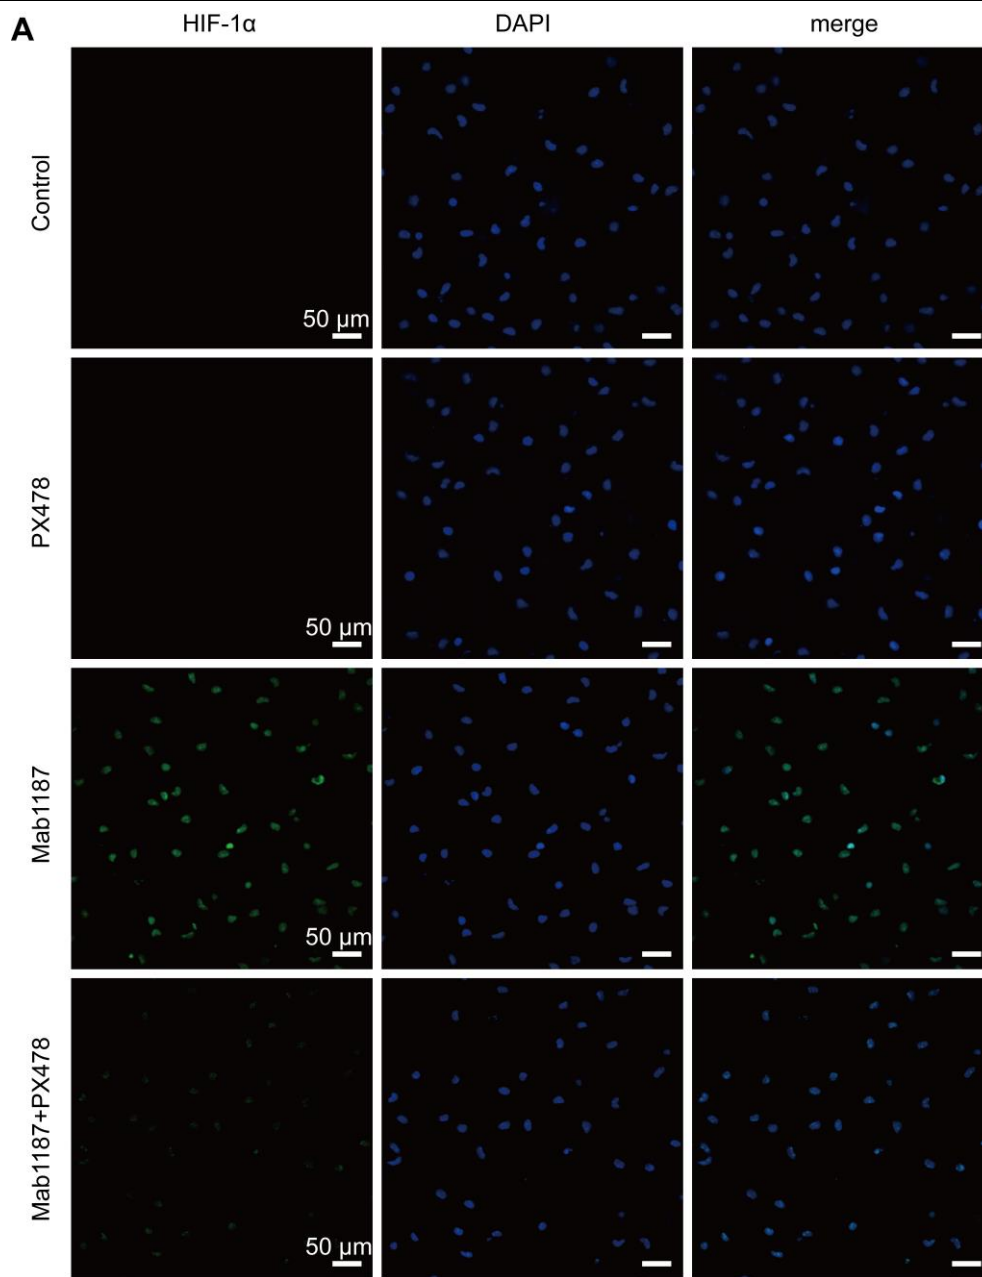

18  
19 **Supplementary Figure 3.** PX-478 significantly inhibited HIF-1 $\alpha$  accumulation and translocation to the  
20 nucleus induced by TREM-1 activation. Macrophages ( $2 \times 10^5$  cells/well) were premixed with PBS control or  
21 PX-478 (25  $\mu$ M) for 30 min, then plated into 24-well plates with agonist anti-TREM-1 mAb (10  $\mu$ g/mL) for  
22 24 h. (A) Macrophages were subjected to immunofluorescence examination to analyze the HIF-1 $\alpha$   
23 accumulation and translocation to the nucleus (scale bar, 50  $\mu$ m).

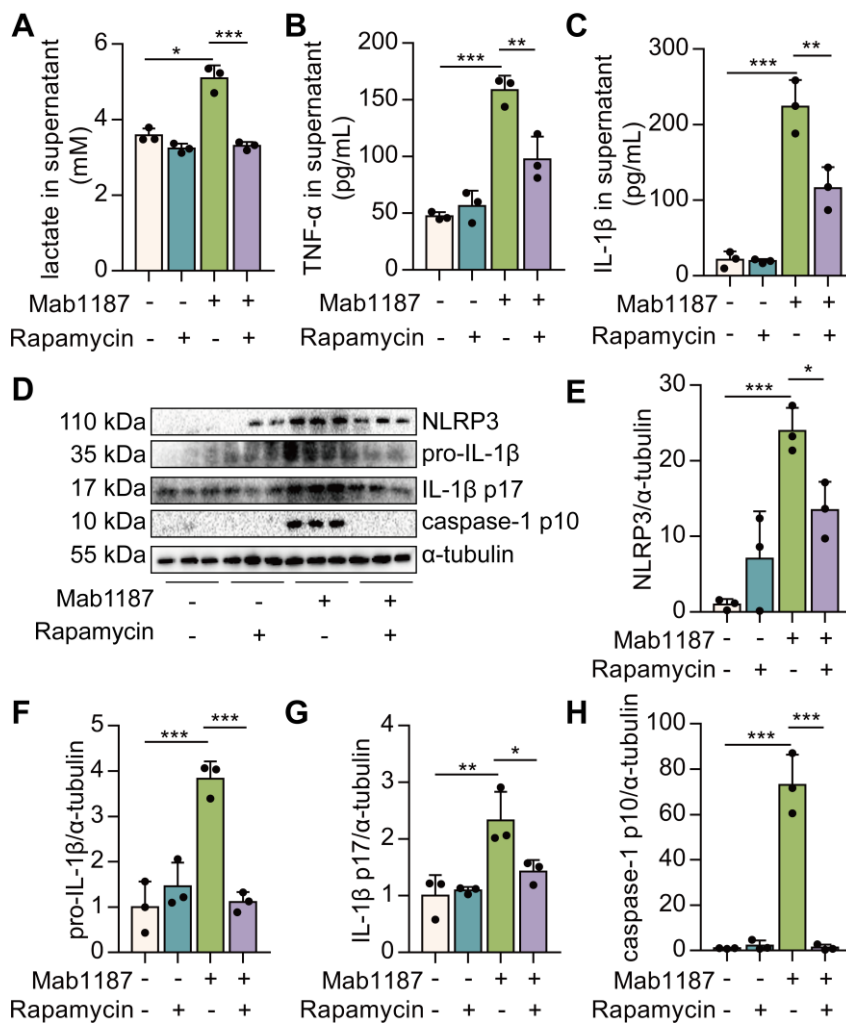

**Supplementary Figure 4.** TREM-1-mediated NLRP3 inflammasome activation depends on mTOR. (A)  $1 \times 10^6$  macrophages/well were premixed with PBS control or rapamycin (100 nM) and then plated into 12-well plates with agonist anti-TREM-1 mAb (10  $\mu$ g/mL). After 24 h, supernatants were analyzed for lactate production,  $n=3$ . (B-C) TNF- $\alpha$  and IL-1 $\beta$  production in the supernatant was measured by ELISA,  $n=3$ . (D) NLRP3, pro-IL-1 $\beta$ , IL-1 $\beta$  p17, and caspase-1 p10 protein in cell lysate were detected by western blot,  $n=3$ . (E-H) Quantification of indicated protein levels in (D),  $n=3$ .  $n=3$  biological replicates. Data are expressed as the mean  $\pm$  SD. One-way ANOVA adjusted by Tukey's multiple comparison test was used. \*  $P < 0.05$ , \*\*  $P < 0.01$ , and \*\*\*  $P < 0.001$ .

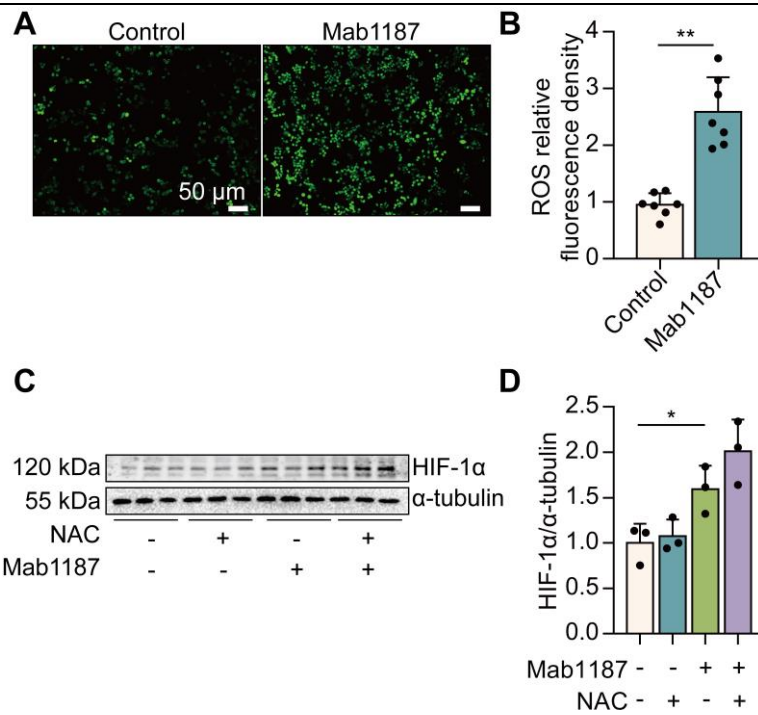

33  
 34 **Supplementary Figure 5.** TREM-1-mediated HIF-1 $\alpha$  accumulation is independent of ROS. (A)  
 35 Macrophages were plated in 24-well plates with agonist anti-TREM-1 mAb (10  $\mu$ g/mL). After 24 h,  
 36 intracellular ROS was measured (scale bar, 50  $\mu$ m). (B) Average fluorescent intensity was calculated by  
 37 Image J,  $n=7$ . (C)  $1 \times 10^6$  macrophages/well were premixed with PBS control or NAC (500  $\mu$ M) and then  
 38 plated into 12-well plates with agonist anti-TREM-1 mAb (10  $\mu$ g/mL). After 24 h, the protein of HIF-1 $\alpha$   
 39 was performed by western blot with  $\alpha$ -tubulin as a loading control,  $n=3$ . (D) Quantification of indicated  
 40 protein levels in (C),  $n=3$ .  $n=3$  biological replicates. Data are expressed as the mean  $\pm$  SD. The student's  
 41  $t$ -test (two-tailed, unpaired) was used to compare Mab1187 and Control in B: \*\*  $P < 0.01$ . One-way ANOVA  
 42 adjusted by Tukey's multiple comparison test was used in D: \*  $P < 0.05$ .
